# Supplementary material for: Effectiveness of Pilates and Yoga to improve bone density in adult women: A systematic review and meta-analysis
Source: PubMed Central journal article supplement (PMC8104420; doi:10.1371/journal.pone.0251391), 2021-05-07
Supplement: pone.0251391.s001.pdf [file pone.0251391.s001.pdf]

|                           | Randomisation process | Deviations from the intended interventions | Missing outcomes | Measurement of the outcome | Selection of reported results | Overall bias |
|---------------------------|-----------------------|--------------------------------------------|------------------|----------------------------|-------------------------------|--------------|
| Irez et al, 2009 [34]     | ?                     | +                                          | +                | +                          | +                             | ?            |
| Bezerra et al, 2010 [30]  | ?                     | +                                          | +                | +                          | +                             | ?            |
| Angin et al, 2015 [17]    | ?                     | +                                          | +                | +                          | +                             | ?            |
| Kim et al, 2015 [35]      | -                     | +                                          | -                | ?                          | ?                             | -            |
| Oliveira et al, 2018 [18] | +                     | +                                          | +                | -                          | +                             | -            |

**S1 Fig.** Quality Assessment for RCTs (RoB 2.0).

 : Low risk of bias;
  : Some concerns;
  : High risk of bias
