# Supplementary material for: Effectiveness of Pilates and Yoga to improve bone density in adult women: A systematic review and meta-analysis
Source: PubMed Central journal article supplement (PMC8104420; doi:10.1371/journal.pone.0251391), 2021-05-07
Supplement: pone.0251391.s002.pdf [file pone.0251391.s002.pdf]

|                                | Selection bias | Study Design | Confounders | Blinding | Data collection method | Withdrawals and dropouts |
|--------------------------------|----------------|--------------|-------------|----------|------------------------|--------------------------|
| Kang et al, 2014 [36]          | ●              | ●            | ●           | ●        | ●                      | ●                        |
| Mikalacki et al, 2015 [19]     | ●              | ●            | ●           | ●        | ●                      | ●                        |
| Lu et al, 2016 [32]            | ●              | ●            | ●           | ●        | ●                      | ●                        |
| Motorwala et al, 2016 [31]     | ●              | ●            | ●           | ●        | ●                      | ●                        |
| Aguado-Henche et al, 2017 [33] | ●              | ●            | ●           | ●        | ●                      | ●                        |
| Serbescu et al, 2017 [37]      | ●              | ●            | ●           | ●        | ●                      | ●                        |

**S2 Fig.** Quality Assessment for non-RCTs and pre-post studies.

● : Strong; ● : Weak; ● : Moderate.
