# Supplementary material for: Effectiveness of Pilates and Yoga to improve bone density in adult women: A systematic review and meta-analysis
Source: PubMed Central journal article supplement (PMC8104420; doi:10.1371/journal.pone.0251391), 2021-05-07

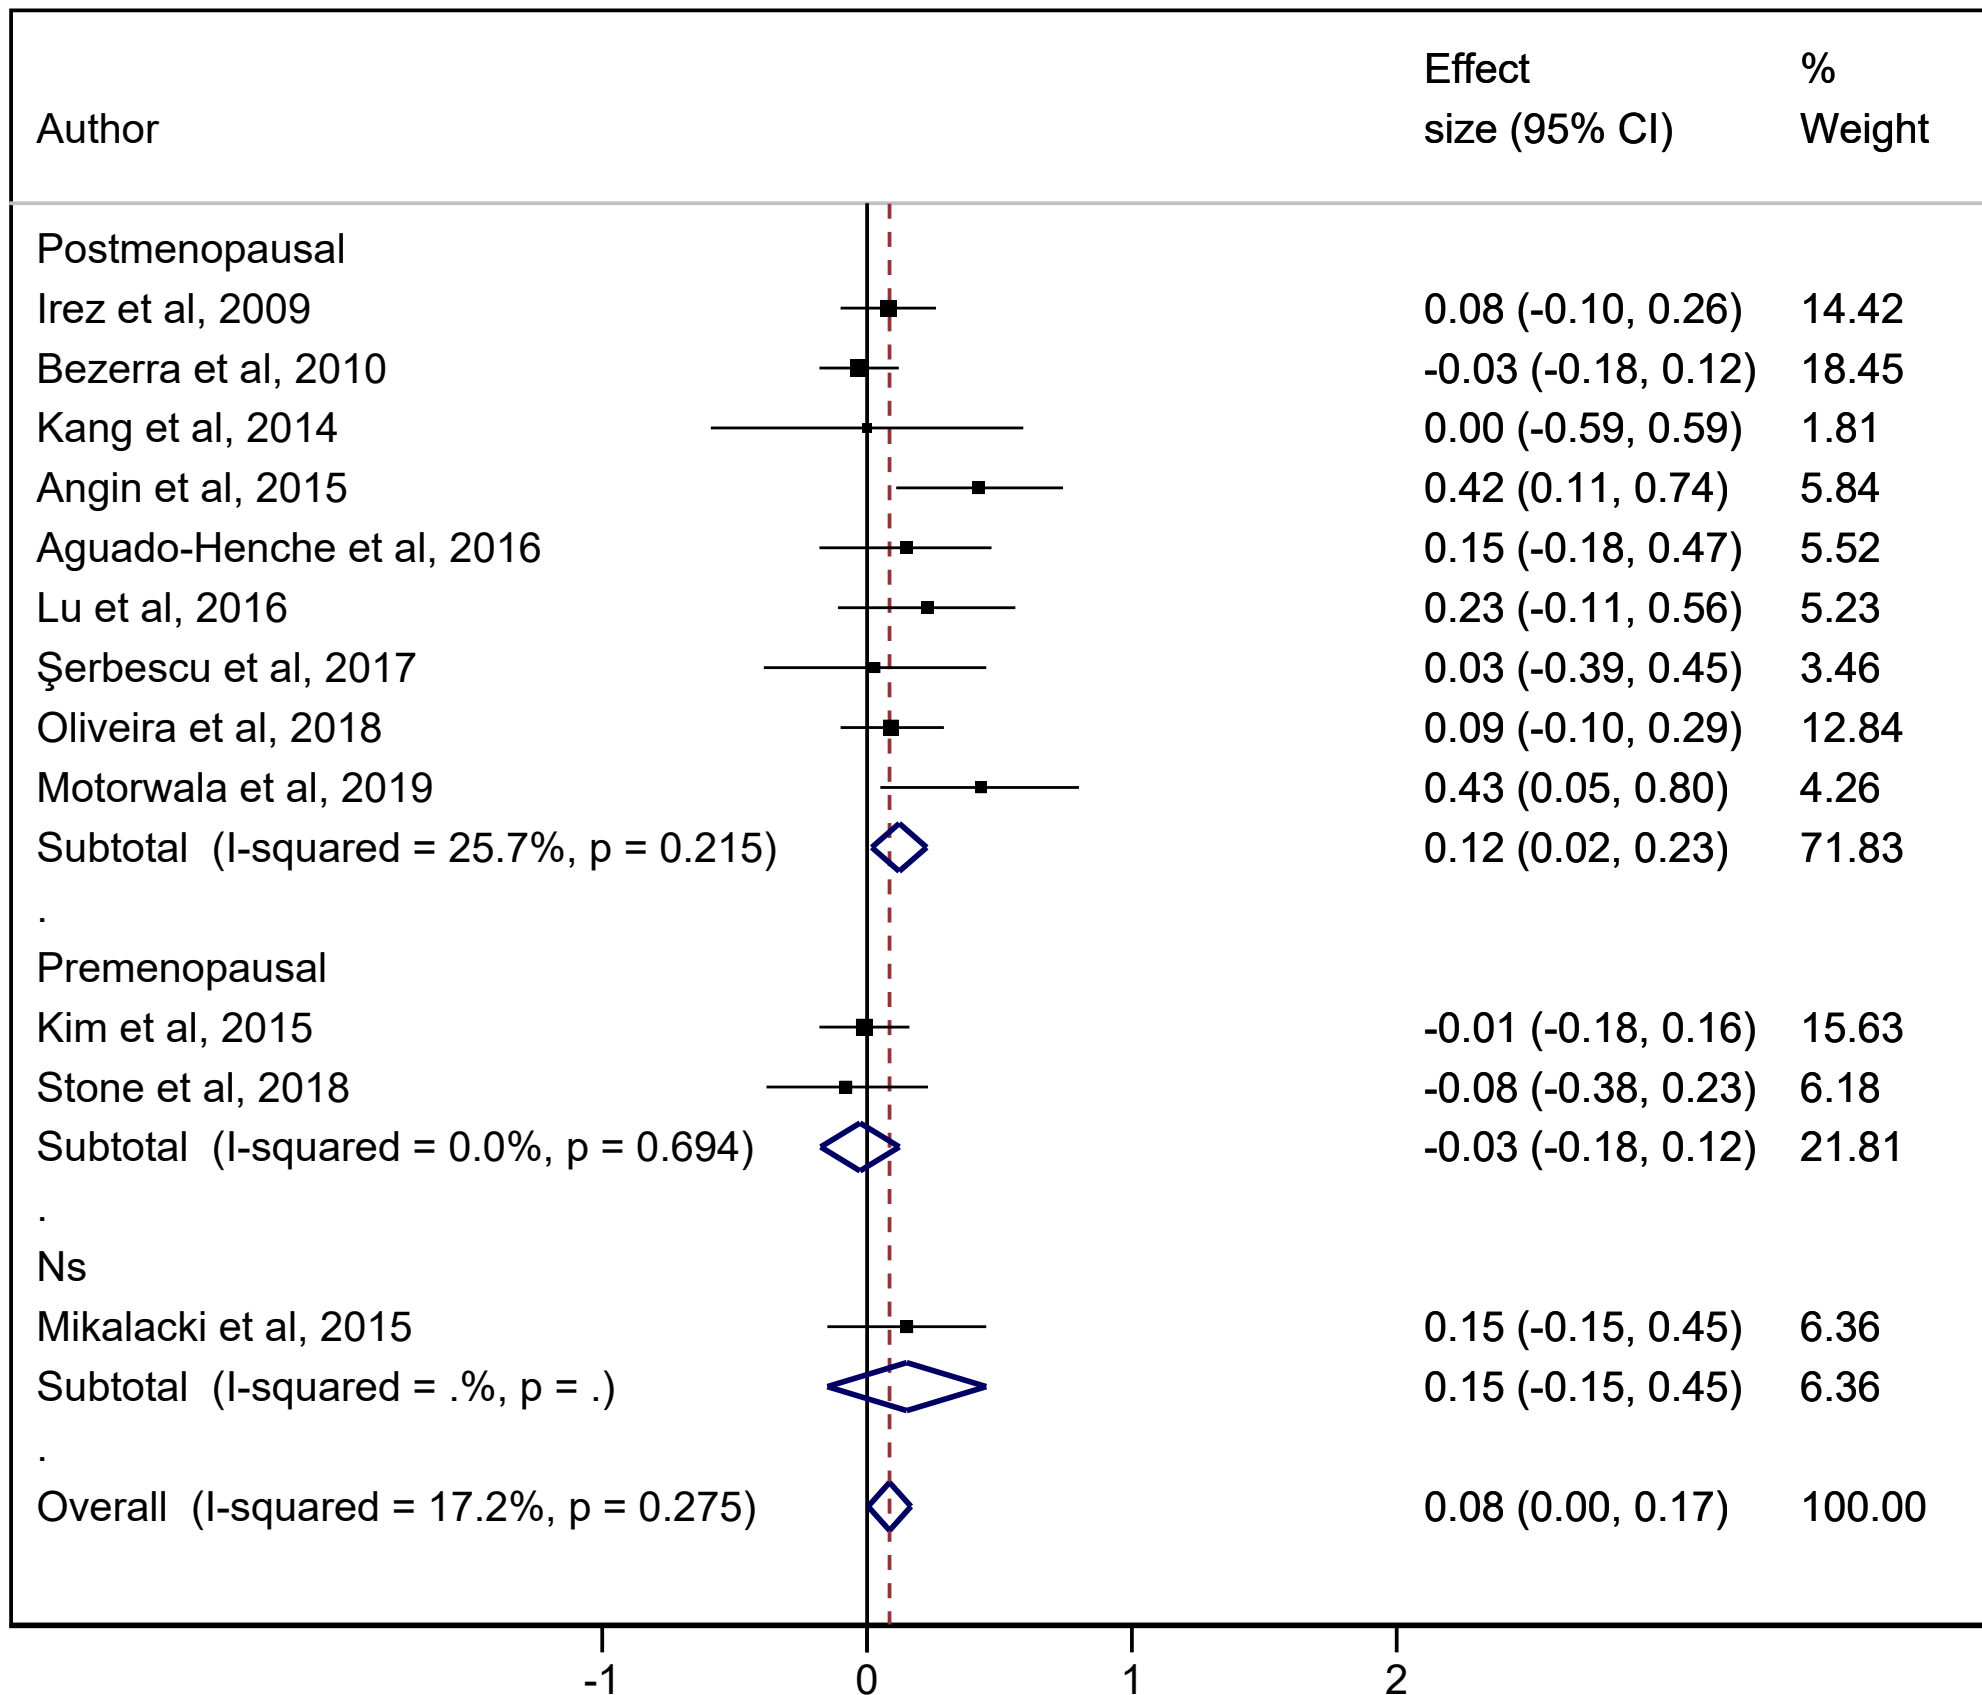

Supplement: pone.0251391.s009.pdf [file pone.0251391.s009.pdf]
